# Supplementary material
Source: ML conference proceedings conference paper supplement (https://proceedings.mlr.press/v101/suzuki19a.html)
Supplement: Supplementary file [file suzuki19a-supp.pdf]

# Supplementary Materials for Hyperbolic Ordinal Embedding

## Appendix A. Proof of Theorem 3

We first introduce a Sarker's  $(1 + \epsilon)$  distortion embedding given by Algorithm 5 in (Sarker, 2011), before we prove that the embedding is a concrete instance of Theorem 3. In the following, the geodesic path in  $\mathcal{H}^2$  from  $\mathbf{x} \in \mathbb{H}^2$  to  $\mathbf{y} \in \mathbb{H}^2$  is denoted by  $c(\mathbf{x}, \mathbf{y})$ . Let  $\mathcal{G} = ([N], \mathcal{E})$  be a tree. Let  $\deg(v)$  denotes the degree of  $v \in [N]$ , defined by

$$\deg(v) := |\{u \in [N] \mid (u, v) \in \mathcal{E}\}|. \quad (27)$$

Let the maximum degree of any vertex in  $\mathcal{G}$  denoted by  $\deg(\mathcal{G})$ , which is defined by

$$\deg(\mathcal{G}) := \max \{\deg(v) \mid v \in [N]\}. \quad (28)$$

We denote the graph distance of graph  $\mathcal{G} = ([N], \mathcal{E})$  by  $d_{\mathcal{G}} : [N] \times [N] \rightarrow \mathbb{Z}_{\geq 0}$ . In the following, we introduce Sarker's  $(1 + \epsilon)$  distortion embedding for tree  $\mathcal{G}$ , with distortion parameter  $\epsilon \in \mathbb{R}_{>0}$ . By regarding object  $N$  as the root, we can regard  $\mathcal{G}$  as a rooted tree. For  $v \in [N - 1]$ , let the parent of  $v$  be denoted by  $\text{ch}(1; v)$  and let the  $k - 1$ -th child of  $v$  be denoted by  $\text{ch}(k; v)$ . For the root, let the  $k$ -th child of  $v$  be denoted by  $\text{ch}(k; v)$ . Here  $k \in [\deg(v)]$  if  $v = N$ , and  $k \in [\deg(v) - 1]$  otherwise. In particular,  $k \in [\deg(\mathcal{G})]$ . Fix  $\beta \in \left(0, \frac{\pi}{\deg(\mathcal{G})}\right)$ . Let  $\alpha = \frac{2\pi}{\deg(\mathcal{G})} - \beta$ ,  $\nu = -2 \ln\left(\tan \frac{\beta}{2}\right)$ , and  $\tau = \nu \frac{1+\epsilon}{\epsilon}$ . For the root  $v = N$ , first, arbitrarily place  $\mathbf{x}_N$  in  $\mathbb{H}^2$ , then  $\mathbf{x}_{\text{ch}(1;v)}$  so that  $d_{\mathbb{H}^2}(\mathbf{x}_N, \mathbf{x}_{\text{ch}(1;v)}) = \tau$ . Then, recursively, for all objects  $v \in [N]$  whose embedding has been already placed, we place the embeddings  $\mathbf{x}_{\text{ch}(k;v)}$  ( $k = 2, 3, \dots, \deg(v)$ ) of the children of  $v$  so that the following conditions are satisfied.

- $d_{\mathbb{H}^2}(\mathbf{x}_v, \mathbf{x}_{\text{ch}(k;v)}) = \tau$ .
- The angles  $\{\angle \mathbf{x}_{\text{ch}(k;v)} \mathbf{x}_v \mathbf{x}_{\text{ch}(1;v)} \mid k = 2, 3, \dots, [\deg(v)]\}$  are mutually exclusively located in open intervals  $\left\{\left(\frac{2\ell\pi}{\deg(\mathcal{G})} - \alpha, \frac{2\ell\pi}{\deg(\mathcal{G})} + \alpha\right) \mid \ell \in [\deg(\mathcal{G}) - 1]\right\}$ , where  $\angle \mathbf{x}_{\text{ch}(k;v)} \mathbf{x}_v \mathbf{x}_{\text{ch}(1;v)}$  is the angle that  $c(\mathbf{x}_v, \mathbf{x}_{\text{ch}(k;v)})$  makes with  $c(\mathbf{x}_{\text{ch}(1;v)}, \mathbf{x}_v)$ .

In the following, the embedding given by the above algorithm is called Sarker's  $(1 + \epsilon)$  distortion embedding. For any Sarker's  $(1 + \epsilon)$  distortion embedding, the following holds.

**Theorem 12 (Theorem 6 in (Sarker, 2011))** *Let  $\mathcal{G} = ([N], \mathcal{E})$  be a tree. For all  $\epsilon \in \mathbb{R}_{>0}$  and all embeddings  $(\mathbf{x}_n)_{n \in [N]}$  given by Sarker's  $(1 + \epsilon)$  distortion embedding, the following holds: for any object pair  $(u, v) \in [N] \times [N]$ ,  $\frac{1}{1+\epsilon} \tau d_{\mathcal{G}}(u, v) < d_{\mathbb{H}^2}(\mathbf{x}_u, \mathbf{x}_v) < \tau d_{\mathcal{G}}(u, v)$ , where  $\tau = \nu \frac{1+\epsilon}{\epsilon}$ .*

The previous theorem directly proves Theorem 3.

**Proof [Proof of Theorem 3]** Let  $\text{diam}(\mathcal{G})$  denote the diameter of  $\mathcal{G}$ , defined by

$$\text{diam}(\mathcal{G}) := \max \{d_{\mathcal{G}}(u, v) \mid u, v \in [N]\}. \quad (29)$$

According to Theorem 12 in (Sarkar, 2011), for any  $\epsilon > 0$ , there exists embedding  $(\mathbf{x}_n)_{n \in [N]}$  and factor  $\tau > 0$  such that for any object pair  $(u, v) \in [N] \times [N]$ ,  $\frac{1}{1+\epsilon} \tau d_{\mathcal{G}}(u, v) < d_{\mathbb{H}^2}(x_u, x_v) < \tau d_{\mathcal{G}}(u, v)$ . By setting  $\epsilon = \frac{1}{\text{diam}(\mathcal{G})}$ , we have embedding  $(\mathbf{x}_n)_{n \in [N]}$  such that for any object pair  $(u, v) \in [N] \times [N]$ ,  $\tau[d_{\mathcal{G}}(u, v) - 1] < d_{\mathbb{H}^2}(x_u, x_v) < \tau d_{\mathcal{G}}(u, v)$ , which completes the proof. ■

## Appendix B. Proof of Theorem 8

**Definition 13** We say that  $\mathcal{G} = ([N], \mathcal{E})$  includes a  $m$ -star if there exists a set of vertices  $v_0, v_1, \dots, v_m \in [N]$  such that for all  $i = 1, 2, \dots, m$ ,  $(v_0, v_i) \in \mathcal{E}$  and for all  $i, j = 1, 2, \dots, m$  such that  $i \neq j$ ,  $(v_i, v_j) \notin \mathcal{E}$ .

The following trivial proposition states the relation between Definition 13 and tree.

**Proposition 14** If a graph  $\mathcal{G}$  is a tree and  $\deg(\mathcal{G}) = m$ , then  $\mathcal{G}$  includes a  $m$ -star.

**Proof** [Proof of Theorem 8] Assume that the embedding  $(\mathbf{x}_n)_{n \in [N]}$  in  $\mathbb{R}^D$  that is non-contradictory to the complete ordinal triplet data of  $\mathcal{G}$ . According to Proposition 14,  $\mathcal{G}$  includes a  $m$ -star. In this proof, the center of the sub  $m$ -star is relabeled  $m+1$  and the vertices that has an edge to  $m+1$  are relabeled  $1, 2, \dots, m$ . In the following,  $\|\cdot\|_2$  denotes the 2-norm defined by  $\|\mathbf{x}\|_2 := \sqrt{\mathbf{x}^\top \mathbf{x}}$ , and the closed ball with center  $\mathbf{x} \in \mathbb{R}^D$  and radius  $R \in \mathbb{R}_{\geq 0}$  is denoted by  $B_R[\mathbf{x}]$ , defined by  $B_R[\mathbf{x}] := \{\mathbf{x}' \in \mathbb{R}^D \mid \|\mathbf{x}' - \mathbf{x}\|_2 \leq R\}$ . Without loss of generality, we can set  $\mathbf{x}_{m+1} = \mathbf{0}$ . Let  $R := \min\{\|\mathbf{x}_n\|_2 \mid n \in [m]\}$ . By the assumption of non-contradiction of embedding, for all  $n, n' \in [m]$  such that  $n \neq n'$ , it holds that  $\mathbf{x}_{n'} \notin B_{\|\mathbf{x}_n\|_2}[\mathbf{x}_n]$ . Define  $\tilde{\mathbf{x}}_n := \frac{1}{\|\mathbf{x}_n\|_2} \mathbf{x}_n$ . For fixed  $n, n' \in [m]$  such that they satisfy  $n \neq n'$  and  $\|\mathbf{x}_n\|_2 \geq \|\mathbf{x}_{n'}\|_2$ , define  $\mathbf{x}'_n := \frac{\|\mathbf{x}_{n'}\|_2}{\|\mathbf{x}_n\|_2} \mathbf{x}_n$ . As  $\mathbf{x}_{n'} \notin B_{\|\mathbf{x}_n\|_2}[\mathbf{x}_n]$  and  $B_{\|\mathbf{x}'_n\|_2}[\mathbf{x}'_n] \subset B_{\|\mathbf{x}_n\|_2}[\mathbf{x}_n]$ , it follows that  $\mathbf{x}_{n'} \notin B_{\|\mathbf{x}'_n\|_2}[\mathbf{x}'_n]$ . By multiplying factor  $\frac{1}{\|\mathbf{x}'_n\|_2}$ , we have  $\tilde{\mathbf{x}}_{n'} \notin B_1[\tilde{\mathbf{x}}_n]$ . Hence, it holds that  $d_{\mathbb{R}^D}(\tilde{\mathbf{x}}_n, \tilde{\mathbf{x}}_{n'}) > 1$ . If we regard  $\tilde{\mathbf{x}}_1, \tilde{\mathbf{x}}_2, \dots, \tilde{\mathbf{x}}_m$  as points in the  $D-1$  dimensional unit sphere, for all  $n, n' \in [m]$  such that  $n \neq n'$ , it holds that  $d_{\mathbb{S}^{D-1}}(\tilde{\mathbf{x}}_n, \tilde{\mathbf{x}}_{n'}) > \frac{\pi}{3}$ . Therefore,  $m$  cannot be larger than the  $\frac{\pi}{3}$ -packing number of  $\mathbb{S}^{D-1}$ . ■
